# Supplementary material
Source: publisher figshare collection journal article supplement (https://karger.figshare.com/ndownloader/files/25916346)
Supplement: Supplementary file 1 [file 25916346]

**Supplementary material**

**Supplementary Figure 1.** Movement processing – visualization of pitch, yaw and roll for analyzing head rotation. Pitch: Rotation of the head leaned towards the shoulder in radians; Yaw: Rotation of the head to the left direction or to right direction in radians; Roll: Rotation of the head towards upward or downwards direction in radians.

*Head_Rotation = Sum(distance.euclidean(rotation(x1,y1,z1),rotation(x2,y2,z2)))*


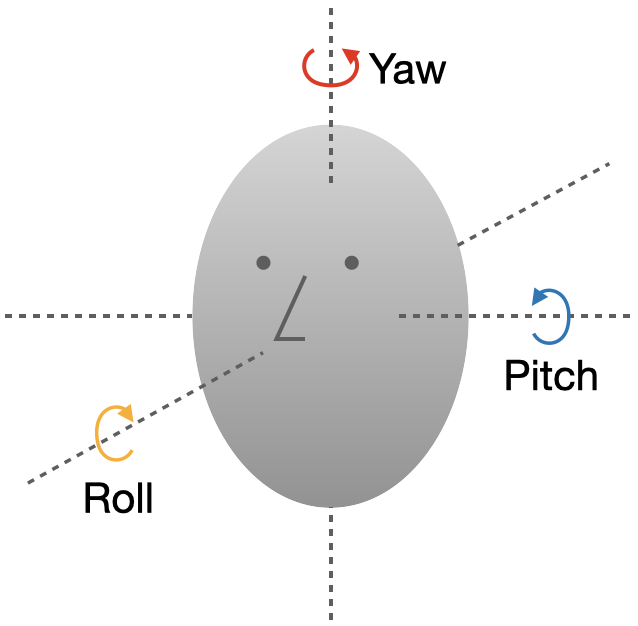


**Supplementary Table 1.** Descriptive statistics cognitive performance for each cognitive domain.

| **Cognitive domain** | | **Mean** | **SD** | **Max** | **Min** |
| --- | --- | --- | --- | --- | --- |
| Motor Coordination | 0.034 | | 2.284 | 9.094 | -4.981 |
| Emotion Bias | -0.359 | | 0.958 | 1.336 | -2.250 |
| Processing Speed | 0.231 | | 2.040 | 9.785 | -7.231 |
| Sustained Attention | -0.627 | | 2.152 | 7.405 | -8.001 |
| Controlled Attention | -0.204 | | 0.668 | 1.280 | -2.168 |
| Flexibility | 0.559 | | 2.557 | 8.341 | -6.426 |
| Inhibition | -0.282 | | 0.679 | 0.741 | -1.968 |
| Executive Function | -0.213 | | 1.707 | 9.302 | -5.863 |

**Supplementary Table 2.** Predictive matrix for motor retardation.

|  | **Cross-validation results** | | | | |
| --- | --- | --- | --- | --- | --- |
| **ML algorithm** | **R2** | **MAE** | **RMSE** | **MAPE(%)** | **Ranking** |
| SVM | 0.5611 | 0.0681 | 0.1207 | 6.4 | 3 |
| Random Forest | 0.2560 | 0.0795 | 0.1221 | 9.6 | 5 |
| XG-Boost | 0.5463 | 0.0724 | 0.1246 | 4.5 | 1 |
| Gradient Boost | 0.5423 | 0.0646 | 0.1220 | 5.1 | 2 |
| Elastic net | -0.0109 | 0.0928 | 0.1582 | 22.5 | 6 |
| Ada-boost | 0.3428 | 0.0745 | 0.1269 | 6.5 | 4 |
| Linear regression | 0.2913 | 0.0854 | 0.1324 | 46.4 | 9 |
| lasso regression | 0.2919 | 0.0852 | 0.1324 | 46.3 | 7 |
| Ridge regression | 0.2515 | 0.0847 | 0.1361 | 46.3 | 8 |

**Supplementary Table 3.** Predictive matrix for emotion bias.

|  | **Cross-validation results** | | | | |
| --- | --- | --- | --- | --- | --- |
| **ML algorithm** | **R2** | **MAE** | **RMSE** | **MAPE(%)** | **Ranking** |
| SVM | 0.5809 | 0.0797 | 0.1534 | 8.4 | 4 |
| Random Forest | 0.5788 | 0.0823 | 0.1545 | 7.5 | 1 |
| XG-Boost | 0.5763 | 0.0724 | 0.1387 | 7.6 | 2 |
| Gradient Boost | 0.5551 | 0.1072 | 0.1420 | 7.9 | 3 |
| Elastic net | 0.1679 | 0.1518 | 0.1942 | 26.7 | 6 |
| Ada-boost | 0.4839 | 0.1239 | 0.1532 | 8.8 | 5 |
| Linear regression | 0.1279 | 0.1559 | 0.1988 | 31.5 | 9 |
| lasso regression | 0.1309 | 0.1552 | 0.1985 | 30.57 | 7 |
| Ridge regression | 0.1977 | 0.1488 | 0.1907 | 30.9 | 8 |

**Supplementary Table 4.** Predictive matrix for processing speed norm.

|  | **Cross-validation results** | | | | |
| --- | --- | --- | --- | --- | --- |
| **ML algorithm** | **R2** | **MAE** | **RMSE** | **MAPE(%)** | **Ranking** |
| SVM | 0.2412 | 0.0690 | 0.1045 | 4.3 | 3 |
| Random Forest | 0.2321 | 0.0617 | 0.1366 | 9.1 | 5 |
| XG-Boost | 0.4209 | 0.0521 | 0.0997 | 3.0 | 1 |
| Gradient Boost | 0.4532 | 0.0511 | 0.1092 | 3.3 | 2 |
| Elastic net | 0.3087 | 0.0645 | 0.0998 | 6.9 | 4 |
| Ada-boost | -0.0495 | 0.0628 | 0.1232 | 29.8 | 9 |
| Linear regression | 0.2883 | 0.0674 | 0.1012 | 24.1 | 8 |
| lasso regression | 0.3092 | 0.0645 | 0.1078 | 23.9 | 7 |
| Ridge regression | 0.2772 | 0.0628 | 0.1020 | 23.8 | 6 |

**Supplementary Table 5.** Predictive matrix for sustained attention norm,

|  | **Cross-validation results** | | | | |
| --- | --- | --- | --- | --- | --- |
| **ML algorithm** | **R2** | **MAE** | **RMSE** | **MAPE(%)** | **Ranking** |
| SVM | 0.5282 | 0.0618 | 0.0858 | 4.3 | 1 |
| Random Forest | -0.2724 | 0.0778 | 0.1266 | 44.5 | 8 |
| XG-Boost | 0.5082 | 0.0656 | 0.0897 | 4.4 | 2 |
| Gradient Boost | 0.4587 | 0.0698 | 0.0992 | 5.1 | 3 |
| Elastic net | 0.1216 | 0.0991 | 0.1458 | 5.1 | 4 |
| Ada-boost | -0.2205 | 0.0911 | 0.1458 | 66.3 | 9 |
| Linear regression | 0.2600 | 0.0762 | 0.1036 | 45.2 | 7 |
| lasso regression | 0.2604 | 0.0761 | 0.1036 | 45.2 | 6 |
| Ridge regression | 0.2066 | 0.0748 | 0.1073 | 45.1 | 5 |

**Supplementary Table 6.** Predictive matrix for controlled attention norm.

|  | **Cross-validation results** | | | | |
| --- | --- | --- | --- | --- | --- |
| **ML algorithm** | **R2** | **MAE** | **RMSE** | **MAPE(%)** | **Ranking** |
| SVM | 0.5019 | 0.1135 | 0.1692 | 7.1 | 2 |
| Random Forest | 0.1428 | 0.1439 | 0.1585 | 8.5 | 4 |
| XG-Boost | 0.4528 | 0.1194 | 0.1476 | 7.2 | 3 |
| Gradient Boost | 0.4812 | 0.1088 | 0.1385 | 6.9 | 1 |
| Elastic net | 0.1765 | 0.1510 | 0.1811 | 9.4 | 5 |
| Ada-boost | 0.1665 | 0.1627 | 0.1869 | 9.7 | 6 |
| Linear regression | 0.2011 | 0.1439 | 0.1784 | 18.9 | 7 |
| lasso regression | 0.2089 | 0.1458 | 0.1775 | 19.0 | 8 |
| Ridge regression | 0.1536 | 0.1543 | 0.1836 | 19.6 | 9 |

**Supplementary Table 7.** Predictive matrix for flexibility norm.

|  | **Cross-validation results** | | | | |
| --- | --- | --- | --- | --- | --- |
| **ML algorithm** | **R2** | **MAE** | **RMSE** | **MAPE(%)** | **Ranking** |
| SVM | 0.6192 | 0.0834 | 0.1115 | 5.9 | 3 |
| Random Forest | 0.2764 | 0.0903 | 0.1570 | 9.9 | 5 |
| XG-Boost | 0.5724 | 0.0860 | 0.1158 | 5.7 | 1 |
| Gradient Boost | 0.5214 | 0.0915 | 0.1193 | 5.8 | 2 |
| Elastic net | 0.3425 | 0.0985 | 0.1437 | 7.3 | 4 |
| Ada-boost | 0.3250 | 0.0990 | 0.1422 | 11.9 | 6 |
| Linear regression | 0.3476 | 0.0985 | 0.1431 | 16.3 | 8 |
| lasso regression | 0.3428 | 0.0986 | 0.1436 | 16.3 | 9 |
| Ridge regression | 0.3193 | 0.0978 | 0.1462 | 16.2 | 7 |

**Supplementary Table 8.** Predictive matrix for inhibition norm.

|  | **Cross-validation results** | | | | |
| --- | --- | --- | --- | --- | --- |
| **ML algorithm** | **R2** | **MAE** | **RMSE** | **MAPE(%)** | **Ranking** |
| SVM | 0.4405 | 0.1210 | 0.1502 | 7.4 | 4 |
| Random Forest | 0.3412 | 0.1363 | 0.1822 | 7.3 | 3 |
| XG-Boost | 0.6910 | 0.0912 | 0.1116 | 5.5 | 2 |
| Gradient Boost | 0.6912 | 0.0863 | 0.1241 | 5.3 | 1 |
| Elastic net | 0.1658 | 0.1503 | 0.1834 | 9.1 | 5 |
| Ada-boost | 0.2317 | 0.1459 | 0.1725 | 12.1 | 6 |
| Linear regression | 0.2620 | 0.1371 | 0.1725 | 18.1 | 7 |
| lasso regression | 0.2703 | 0.1400 | 0.1715 | 18.4 | 8 |
| Ridge regression | 0.2094 | 0.1462 | 0.1786 | 18.8 | 9 |

**Supplementary Table 9.** Predictive matrix for executive function norm.

|  | **Cross-validation results** | | | | |
| --- | --- | --- | --- | --- | --- |
| **ML algorithm** | **R2** | **MAE** | **RMSE** | **MAPE(%)** | **Ranking** |
| SVM | -0.4159 | 0.0638 | 0.0824 | 24.7 | 8 |
| Random Forest | 0.2813 | 0.0405 | 0.0835 | 9.3 | 4 |
| XG-Boost | 0.6078 | 0.0332 | 0.0433 | 2.4 | 1 |
| Gradient Boost | 0.3940 | 0.0406 | 0.0539 | 4.3 | 3 |
| Elastic net | -0.0275 | 0.0480 | 0.0702 | 13.7 | 5 |
| Ada-boost | 0.4414 | 0.0425 | 0.0506 | 3.1 | 2 |
| Linear regression | -0.0271 | 0.0536 | 0.0702 | 24.1 | 6 |
| lasso regression | -0.0837 | 0.0544 | 0.0721 | 24.4 | 7 |
| Ridge regression | -0.0122 | 0.0502 | 0.0697 | 23.8 | 9 |
